# Supplementary material
Source: PubMed Central journal article supplement (PMC3359143)

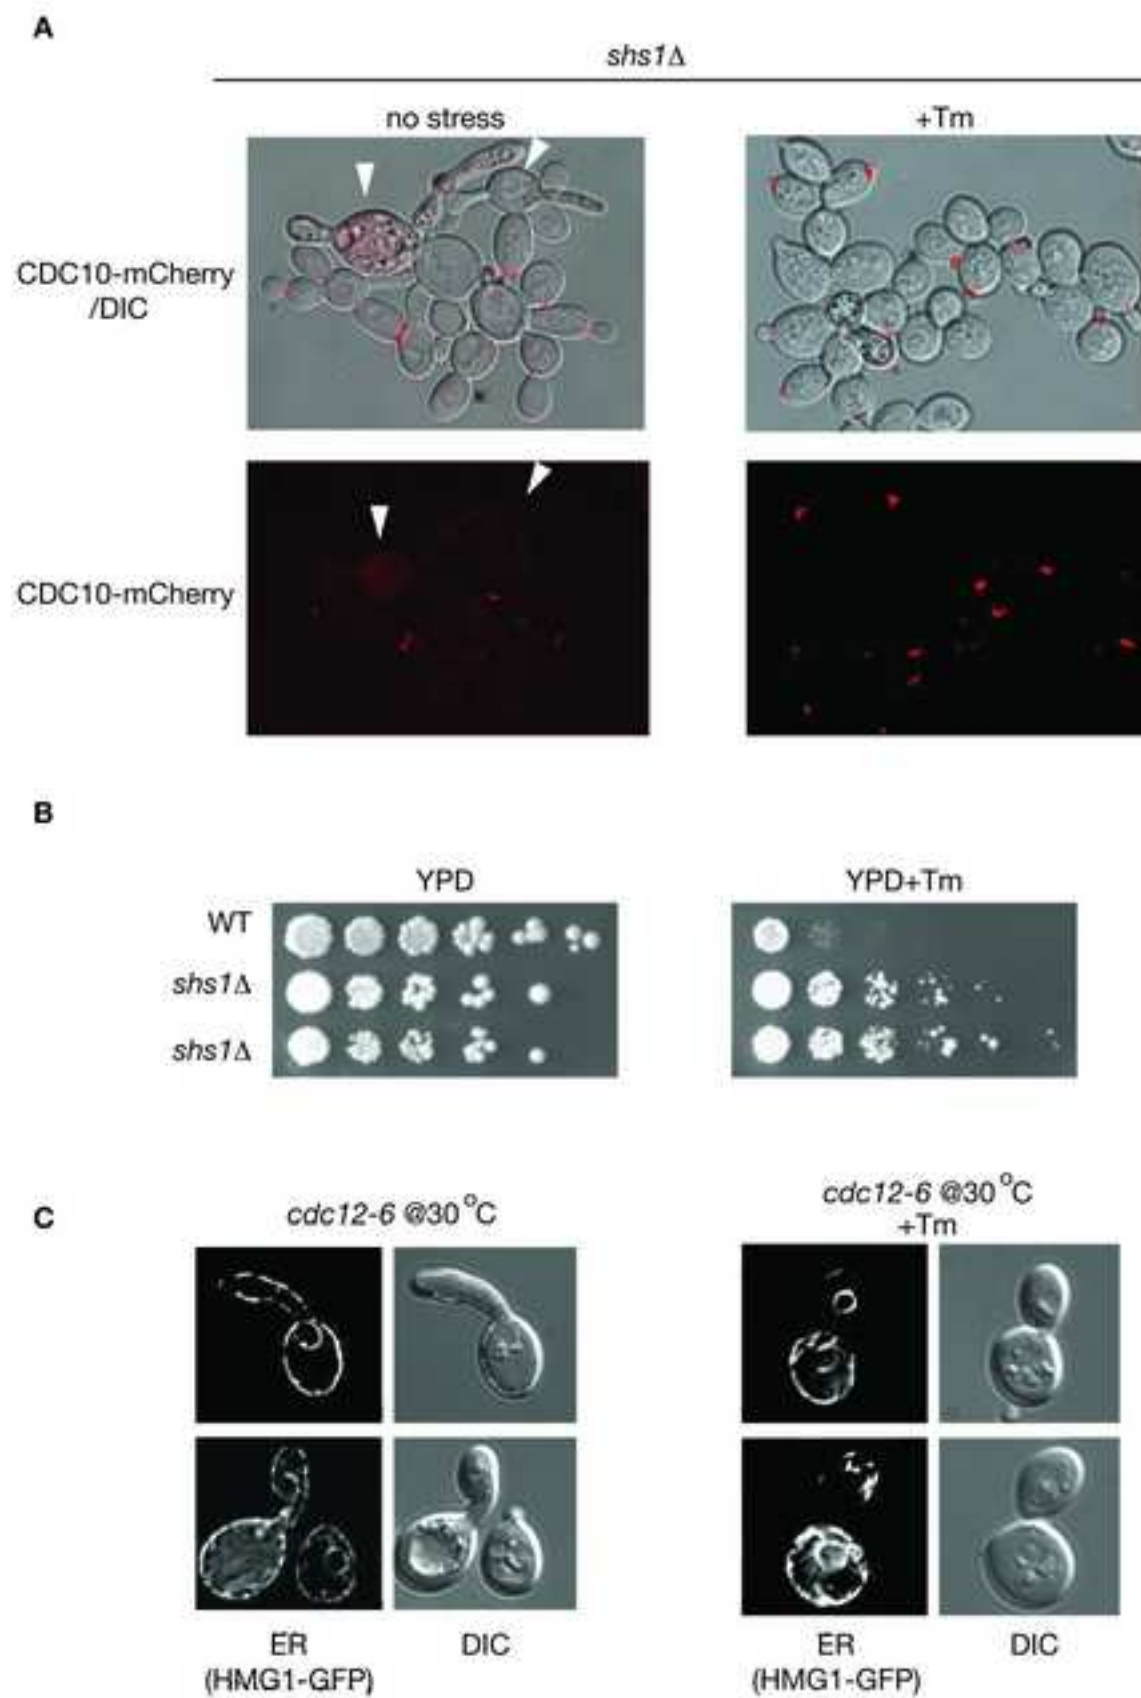

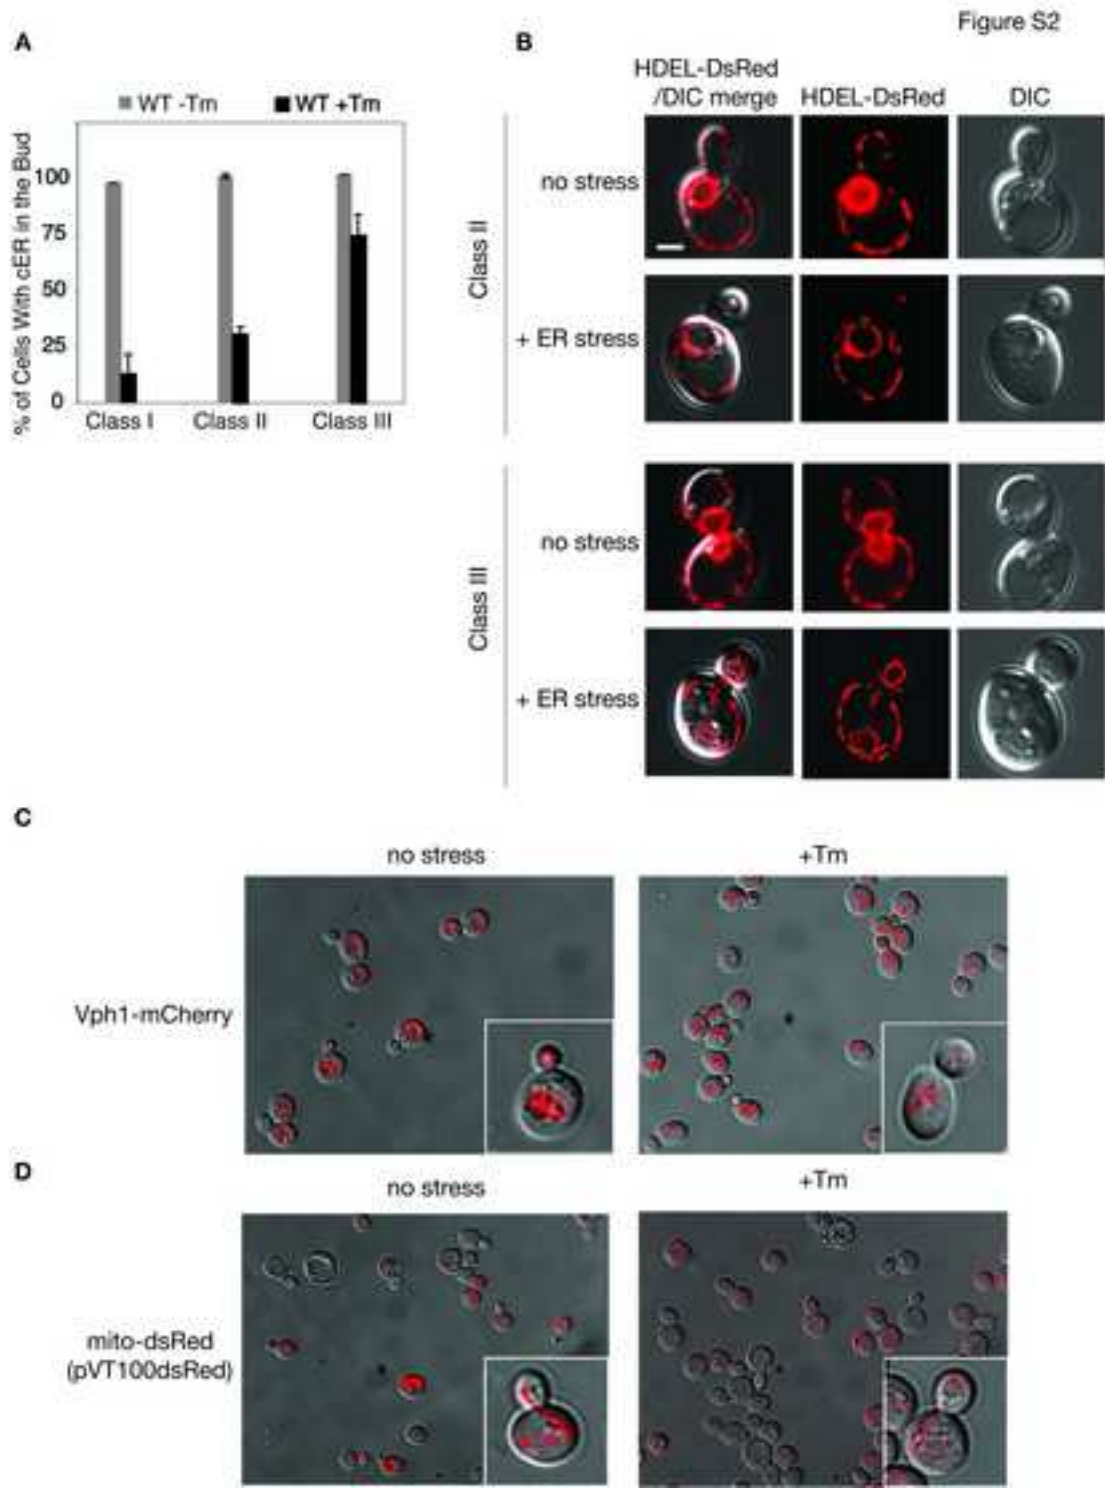

Figure S3

**A**

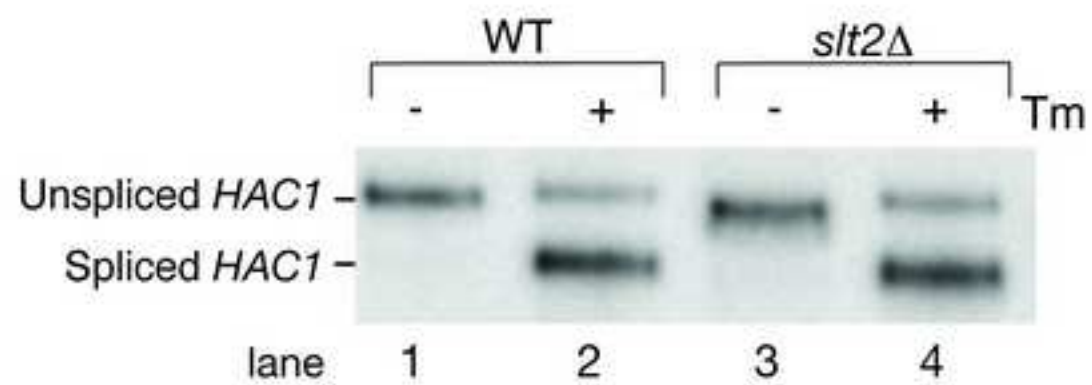

**B**

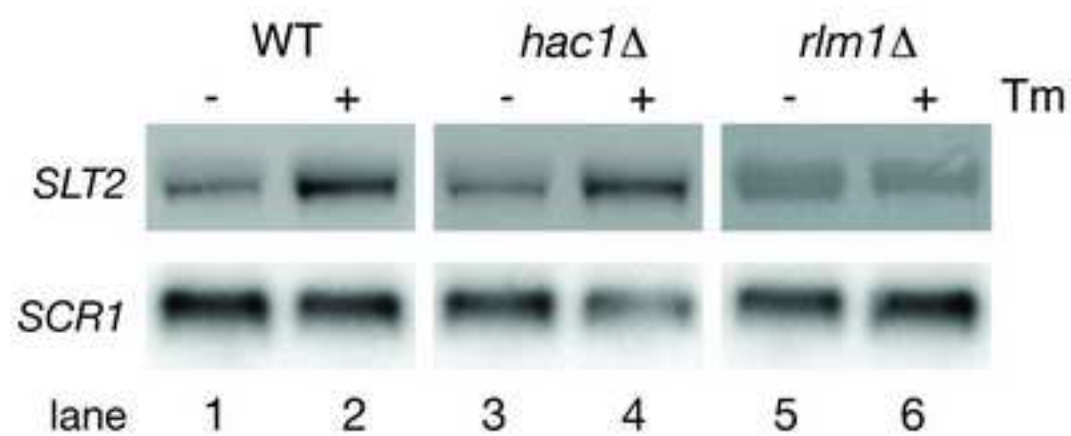

**C**

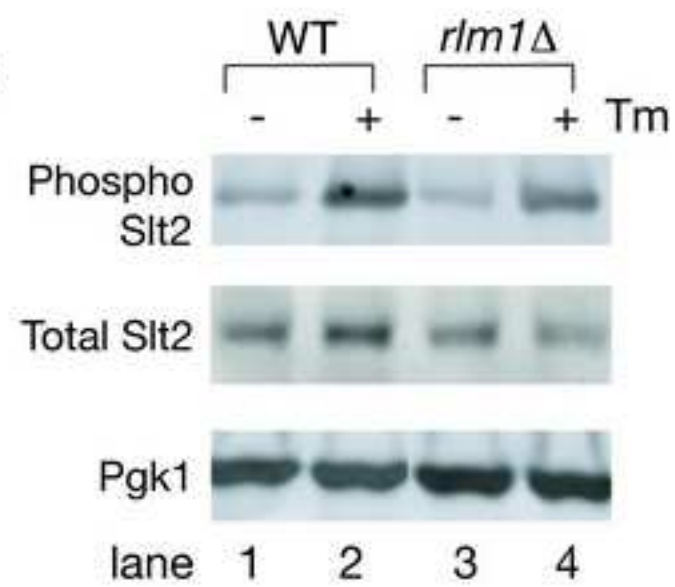

Figure S4

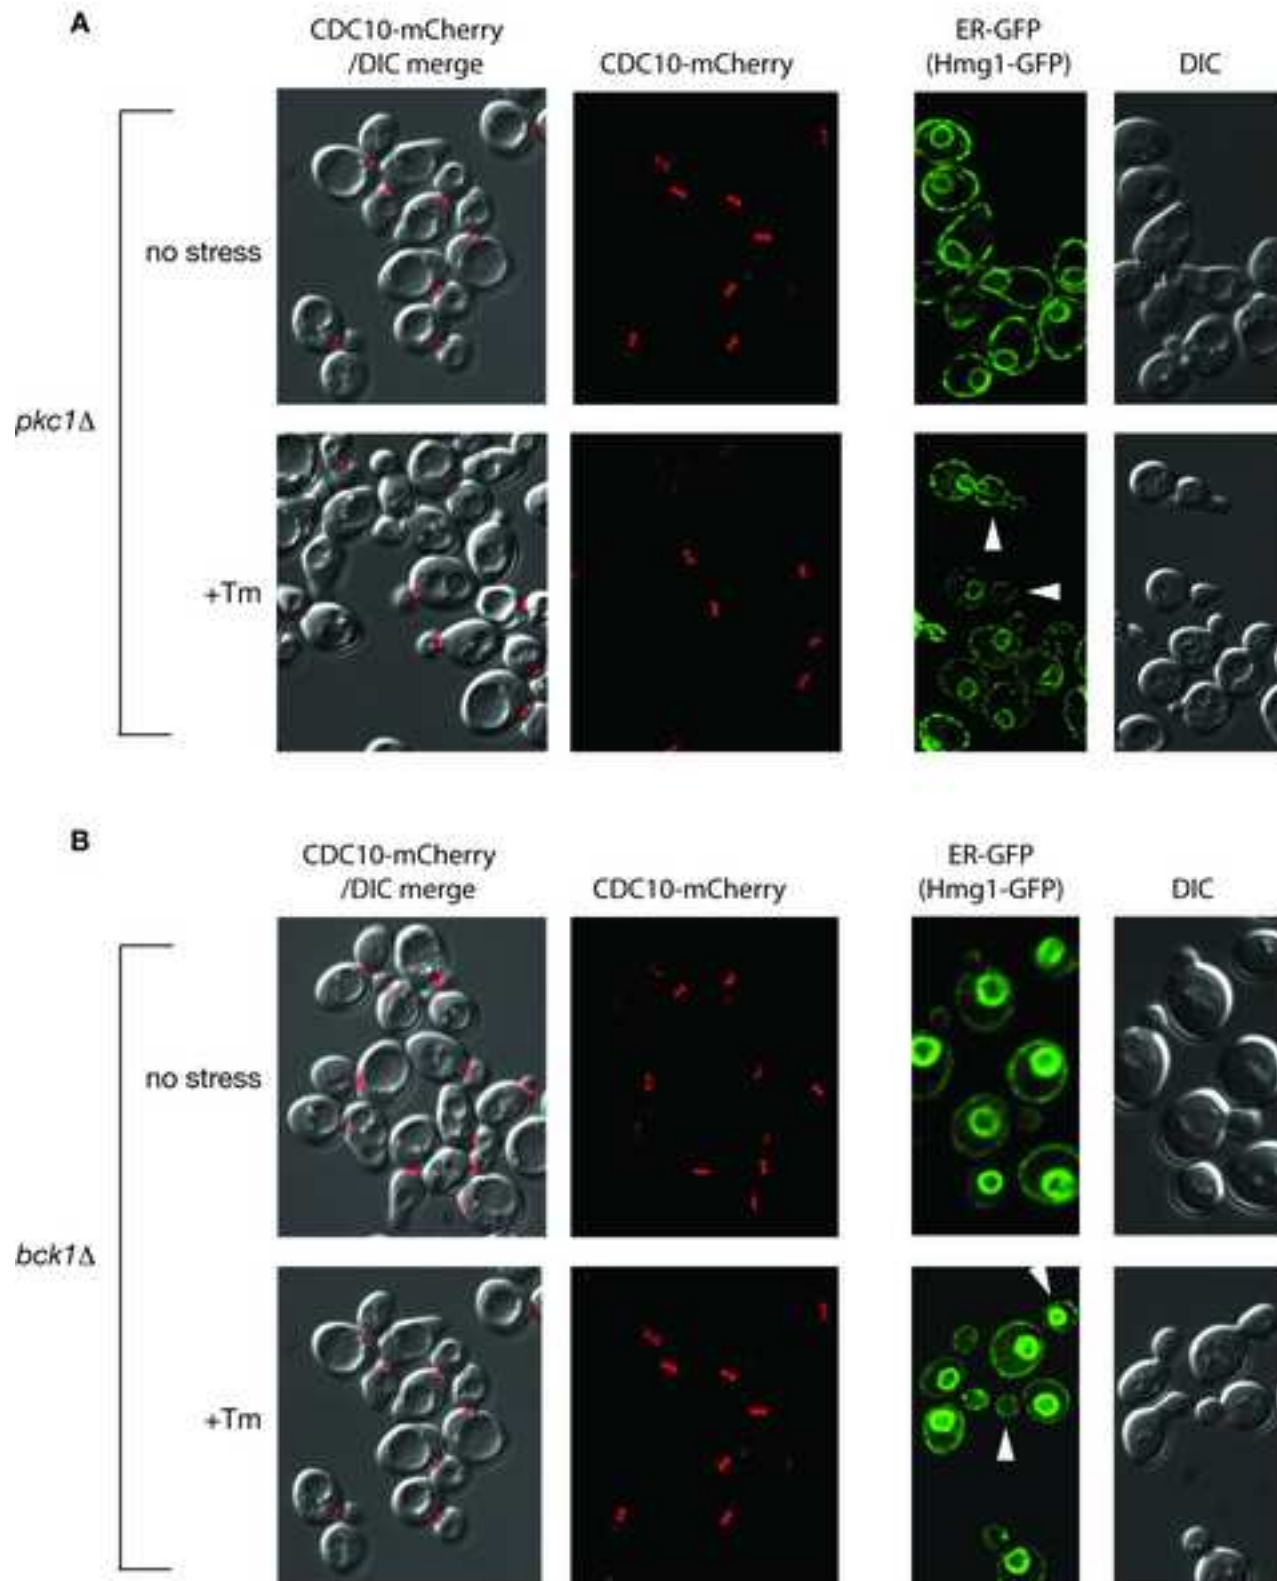

Figure S5

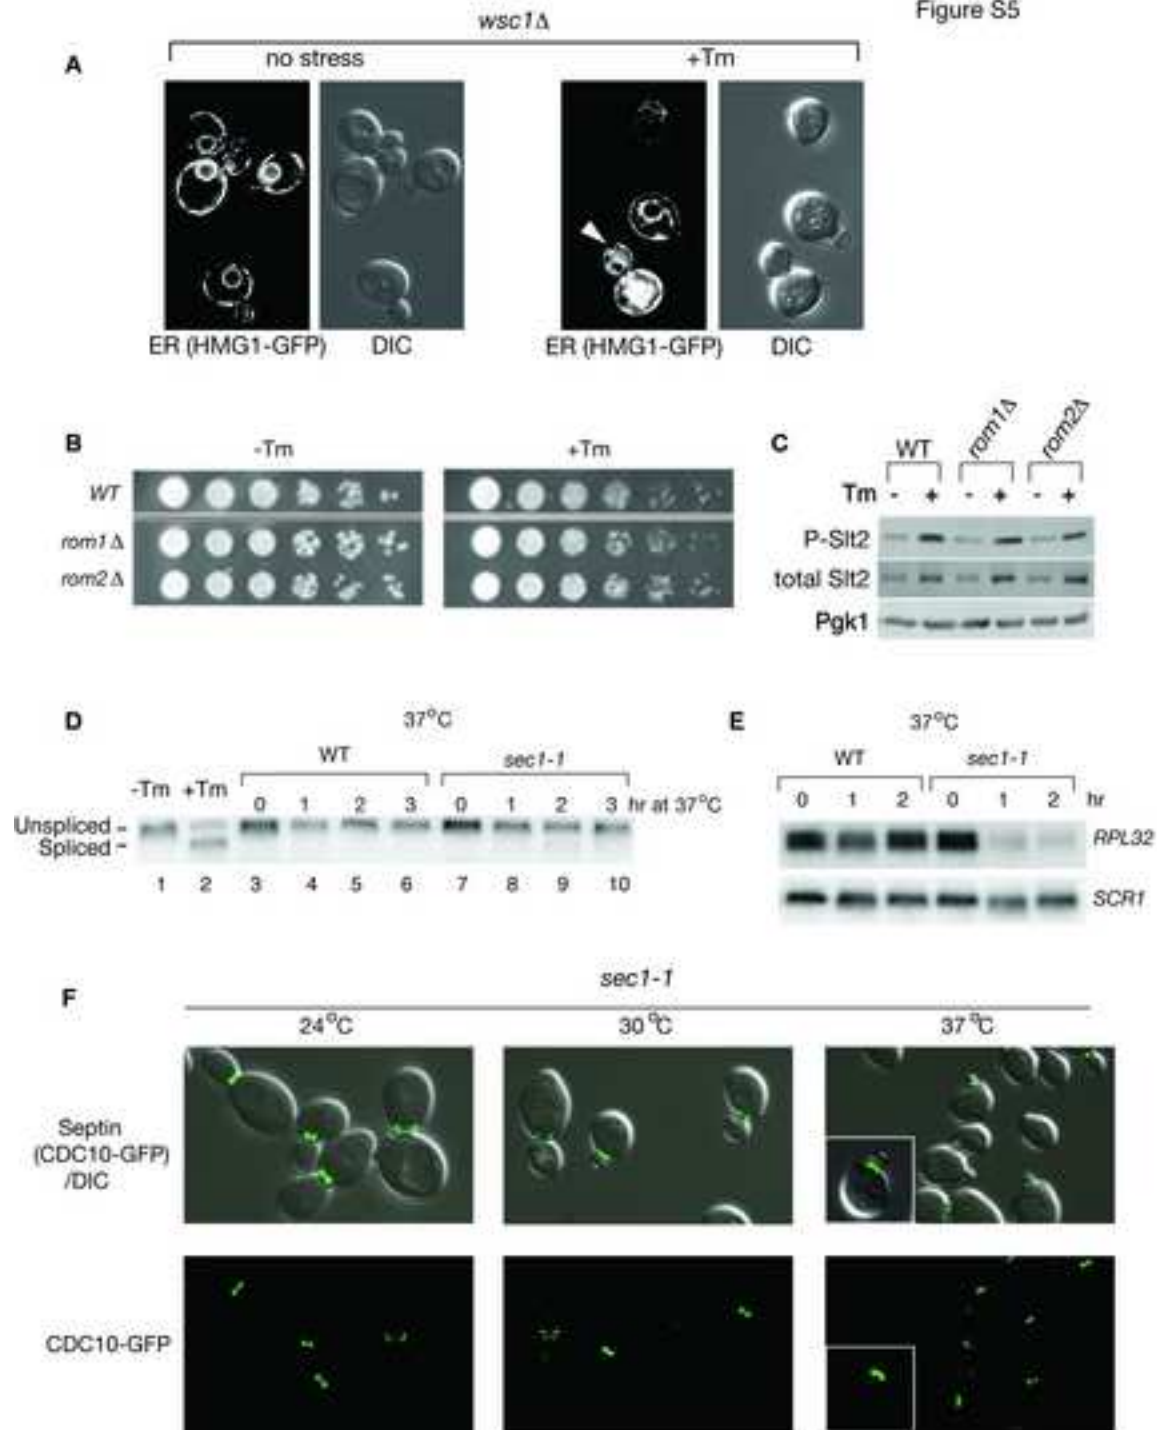



Figure S6

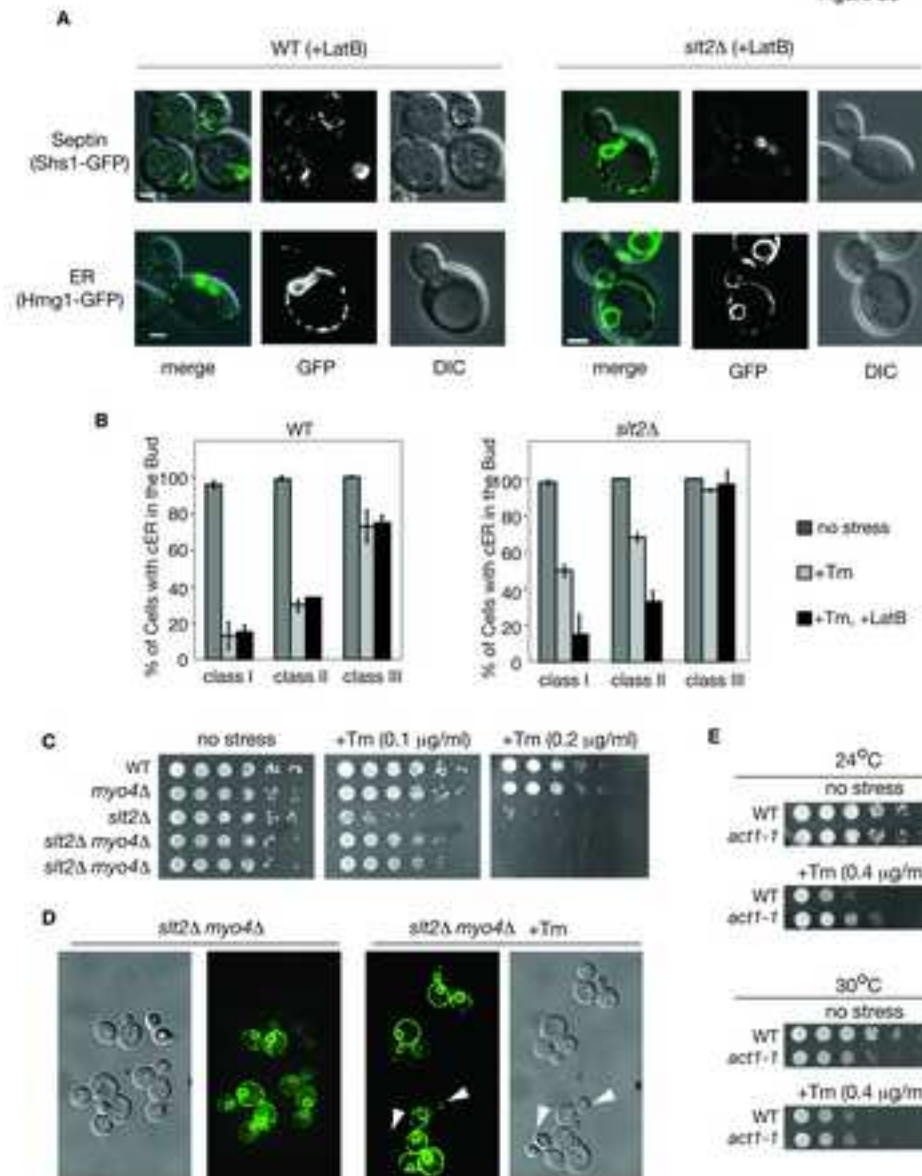

Figure S7

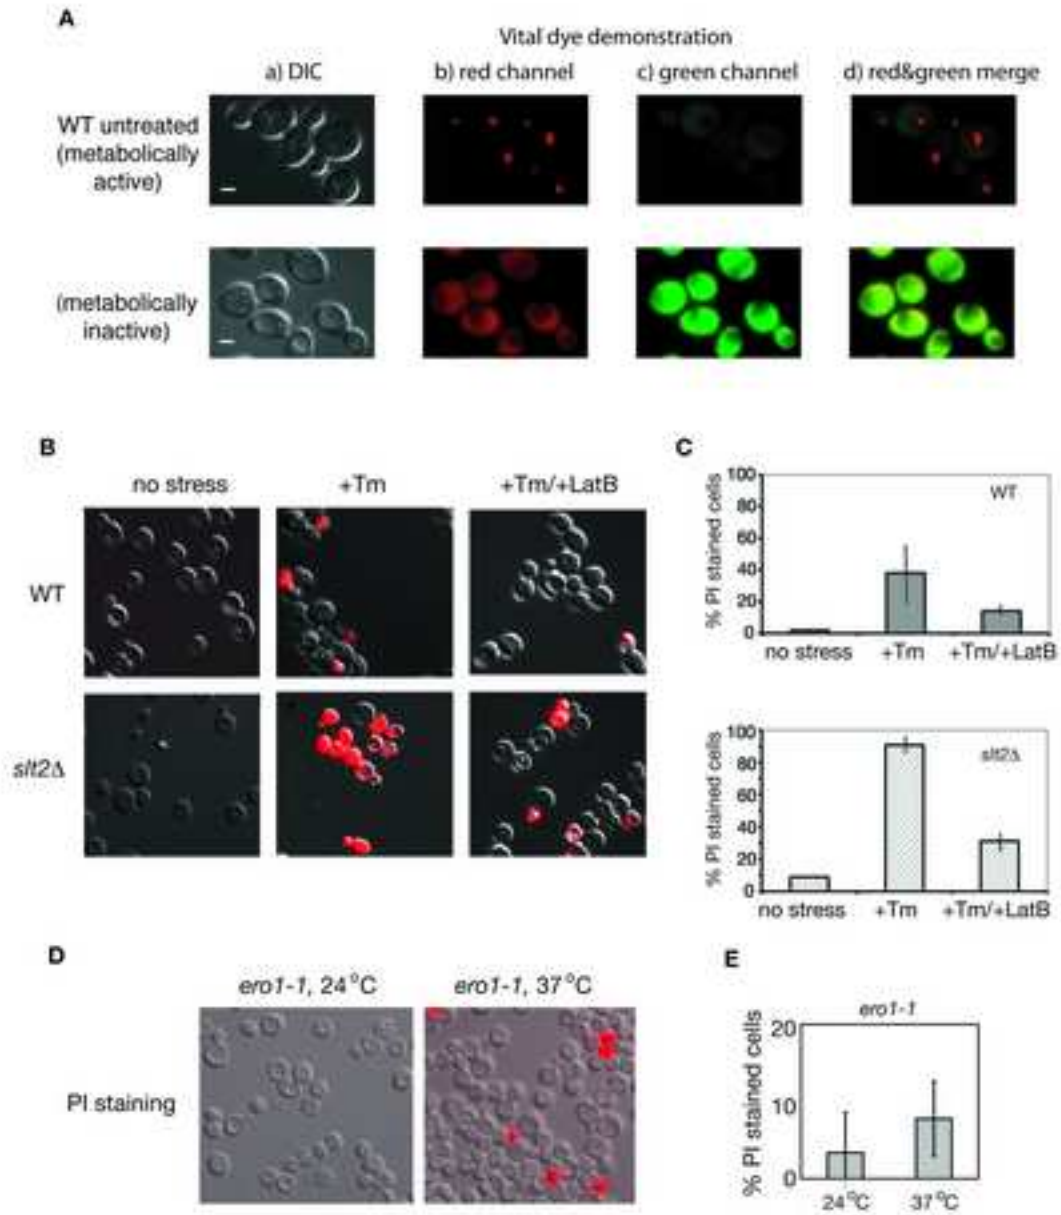

Supplement: NIHMS222329-supplement-02.pdf [file NIHMS222329-supplement-02.pdf]
